# Supplementary material for: Integrated Network Pharmacology and Experimental Verification to Explore the Molecular Mechanism of Hedysarum Multijugum Maxim–Curcumae Rhizoma Herb Pair for Treating Non-Small Cell Lung Cancer
Source: Front Oncol. 2022 Mar 30;12:854596. doi: 10.3389/fonc.2022.854596 (PMC9007519; doi:10.3389/fonc.2022.854596)
Supplement: Supplementary file 1 [file Table_1.xlsx]

## Sheet: Compounds
ID	Name	Formula	Annot. DeltaMass [ppm]	Calc. MW	RT [min]	mzCloud Best Match	mzVault Best Match	Group Area
MOL1	Curcumenol	C15 H22 O2	-0.7	234.162	38.73	87.9	89.5	2.9011e+10
MOL2	Calycosin	C16 H12 O5	-0.56	284.068	31.173	86.1	89.6	2.23326e+10
MOL3	α,α-Trehalose	C12 H22 O11	0.04	342.116	1.819	96.8	94.6	2.21108e+10
MOL4	Proline	C5 H9 N O2	-0.49	115.063	1.819	96.9	98.1	2.15201e+10
MOL5	Formononetin	C16 H12 O4	-0.56	268.073	35.101	97.6	91.7	1.61406e+10
MOL6	Ononin	C22 H22 O9	-0.14	430.126	29.432	85.7	88.8	1.34068e+10
MOL7	Calycosin-7-O-β-D-glucoside	C22 H22 O10	-1.02	446.121	26.589	84.4	86.8	1.24412e+10
MOL8	L-Norleucine	C6 H13 N O2	0.3	131.095	4.76	97	99.6	1.01816e+10
MOL9	Choline	C5 H13 N O	-0.7	103.1	1.695	94.5	86.2	9.60703e+09
MOL10	Citric acid	C6 H8 O7	0.38	192.027	3.771	94.6	96.5	8.52679e+09
MOL11	DL-Arginine	C6 H14 N4 O2	0.12	174.112	1.65	96.6	96.6	8.18568e+09
MOL12	Atractylenolide II	C15 H20 O2	-0.64	232.146	29.161	88	82.2	7.37104e+09
MOL13	Methylnissolin-3-O-glucoside	C23 H26 O10	-0.33	462.152	30.215		89.4	7.00513e+09
MOL14	(15Z)-9,12,13-Trihydroxy-15-octadecenoic acid	C18 H34 O5	0.05	330.241	33.818	83.1	81.3	6.91666e+09
MOL15	L-(-)-Malic acid	C4 H6 O5	-0.21	134.021	1.842	91.7	97.3	6.26235e+09
MOL16	Guanosine	C10 H13 N5 O5	-0.21	283.092	13.941		88.4	4.57705e+09
MOL17	Isomucronulatol 7-O-glucoside	C23 H28 O10	0.12	464.168	30.604		87.5	4.45752e+09
MOL18	trans-3-Indoleacrylic acid	C11 H9 N O2	-0.5	187.063	23.401	95.4	93.2	4.24486e+09
MOL19	Trigonelline	C7 H7 N O2	-0.28	137.048	1.804	96.8	95.6	3.8382e+09
MOL20	L-Pyroglutamic acid	C5 H7 N O3	0.36	129.043	2.019	79.8	83.3	3.53472e+09
MOL21	4-Oxoproline	C5 H7 N O3	0.41	129.043	3.556	89.6	53.8	3.43806e+09
MOL22	Salicylic acid	C7 H6 O3	-0.13	138.032	29.053	96.2	96.9	2.97942e+09
MOL23	Uridine	C9 H12 N2 O6	0.11	244.07	5.913	90.4	97.3	2.50721e+09
MOL24	Guanine	C5 H5 N5 O	0	151.049	13.163	94	90.9	2.13518e+09
MOL25	Azelaic acid	C9 H16 O4	0.2	188.105	28.623	93.9	96.9	1.88928e+09
MOL26	Parthenolide	C15 H20 O3	-0.59	248.141	29.92	88.3	80	1.74099e+09
MOL27	Adenine	C5 H5 N5	0.64	135.055	1.858	87.3	86.9	1.72932e+09
MOL28	L-Homoserine	C4 H9 N O3	-0.08	119.058	1.68	94.8	94.7	1.59674e+09
MOL29	6''-O-Acetylglycitin	C24 H24 O11	-0.04	488.132	29.213		82.1	1.55923e+09
MOL30	Asparagine	C4 H8 N2 O3	0.03	132.054	1.633	71.8	83.2	1.46178e+09
MOL31	Corchorifatty acid F	C18 H32 O5	0.42	328.225	32.703	91.2	88.1	1.35299e+09
MOL32	5-Hydroxymethyl-2-furaldehyde	C6 H6 O3	-0.16	126.032	2.269	81	85.1	1.33206e+09
MOL33	Succinic acid	C4 H6 O4	0.27	118.027	4.6	94.5	96.5	1.23653e+09
MOL34	Uracil	C4 H4 N2 O2	-0.48	112.027	5.94	83.9	85.4	1.20083e+09
MOL35	Nabumetone	C15 H16 O2	-0.23	228.115	41.75	89.6		1.0667e+09
MOL36	L-Glutamic acid	C5 H9 N O4	-0.2	147.053	1.729	89.5	95.8	9.65789e+08
MOL37	Tectoridin	C22 H22 O11	-0.28	462.116	28.209	77.6	76.1	9.61981e+08
MOL38	(±)-Abscisic acid	C15 H20 O4	-0.61	264.136	31.082	81.6	74.4	9.50231e+08
MOL39	(-)-Caryophyllene oxide	C15 H24 O	-0.33	220.183	32.355	84.6	84.6	9.05824e+08
MOL40	D-(+)-Mannose	C6 H12 O6	-0.11	180.063	1.736	86.8	87.6	8.96604e+08
MOL41	o-Veratraldehyde	C9 H10 O3	-0.61	166.063	30.595	74.7	82.1	8.91682e+08
MOL42	4-Dodecylbenzenesulfonic acid	C18 H30 O3 S	-0.07	326.192	48.322	91.9	93.5	8.85031e+08
MOL43	Protocatechualdehyde	C7 H6 O3	-0.22	138.032	39.77	77	79.9	8.42868e+08
MOL44	Valine	C5 H11 N O2	-1.21	117.079	2.596	86.2	80.4	8.29598e+08
MOL45	Cytosine	C4 H5 N3 O	0.06	111.043	3.123	86.3	90.2	7.79555e+08
MOL46	3-Hydroxy-3-methylglutaric acid	C6 H10 O5	0.48	162.053	4.909	84.6	88.3	7.44101e+08
MOL47	Verrucarol	C15 H22 O4	-0.78	266.152	27.838	82.2	76.1	7.10035e+08
MOL48	Cytidine	C9 H13 N3 O5	-0.06	243.086	3.139	82.6	86	6.92913e+08
MOL49	Adenosine 3'5'-cyclic monophosphate	C10 H12 N5 O6 P	0.34	329.053	7.079	79.3	82.5	6.72157e+08
MOL50	Pipecolic acid	C6 H11 N O2	0.14	129.079	2.616	89.1	86	6.40923e+08
MOL51	L-Histidine	C6 H9 N3 O2	0.18	155.07	1.63	91	89.7	5.6173e+08
MOL52	Astragaloside III	C41 H68 O14	0.44	784.461	34.546		90.4	5.20354e+08
MOL53	L-Aspartic acid	C4 H7 N O4	-0.08	133.037	1.652	66.8	76.9	5.11097e+08
MOL54	Atractylenolide III	C15 H20 O3	-0.54	248.141	38.844	87.8	86.8	4.81192e+08
MOL55	Isokaempferide	C16 H12 O6	-0.33	300.063	33.803	80.3	75.7	4.6719e+08
MOL56	2-Furoic acid	C5 H4 O3	-0.28	112.016	1.915	97.5	93.8	4.4188e+08
MOL57	Υ-Aminobutyric acid (GABA)	C4 H9 N O2	0.79	103.063	1.7		85.8	4.20518e+08
MOL58	Astragaloside IV	C41 H68 O14	-0.91	784.46	34.259		84.7	3.8338e+08
MOL59	trans-Aconitic acid	C6 H6 O6	0.14	174.016	4.52	89.4	92	3.83278e+08
MOL60	19-Nortestosterone	C18 H26 O2	-0.37	274.193	38.239	87.7	78.1	3.77341e+08
MOL61	4-Indolecarbaldehyde	C9 H7 N O	-0.61	145.053	23.404	83.7	86.7	3.45987e+08
MOL62	Citraconic acid	C5 H6 O4	-0.11	130.027	6.066		91.7	3.33583e+08
MOL63	BMK methyl glycidate	C11 H12 O3	-0.55	192.079	31.916	80.1	77.3	3.30611e+08
MOL64	(+/-)12(13)-DiHOME	C18 H34 O4	0.5	314.246	40.284	85.7	90.9	3.27246e+08
MOL65	Nardosinone	C15 H22 O3	-0.74	250.157	30.855	86.5	61.7	3.20162e+08
MOL66	Indole	C8 H7 N	-0.98	117.058	23.403	94.6	84.3	3.20142e+08
MOL67	2-Hydroxycaproic acid	C6 H12 O3	-0.02	132.079	25.246	89.7	92.9	3.11352e+08
MOL68	Coniferylalcohol	C10 H12 O3	-0.25	180.079	32	78.6		3.09352e+08
MOL69	Itaconic acid	C5 H6 O4	-0.11	130.027	4.5		91.9	2.99195e+08
MOL70	Benzoic acid	C7 H6 O2	-0.22	122.037	35.955	86.5	88.3	2.89314e+08
MOL71	N-Acetyl-DL-tryptophan	C13 H14 N2 O3	-0.04	246.1	27.278	94.7	97.5	2.82204e+08
MOL72	Linderalactone	C15 H16 O3	-0.22	244.11	30.706	60.4	76.4	2.81924e+08
MOL73	7-Hydroxyflavan	C15 H14 O2	0.08	226.099	40.457	77.8		2.70387e+08
MOL74	2'-O-Methyladenosine	C11 H15 N5 O4	0.03	281.112	22.397	77	82.3	2.68232e+08
MOL75	Docosanamide	C22 H45 N O	-0.66	339.35	58.011	87.1	89.2	2.47724e+08
MOL76	Ligustilide	C12 H14 O2	-0.47	190.099	26.96		83.5	2.40855e+08
MOL77	6-Methylquinoline	C10 H9 N	-0.37	143.073	23.4	76.4	67.3	2.36492e+08
MOL78	Isosakuranetin	C16 H14 O5	-0.68	286.084	28.22	80.8	56.2	2.32478e+08
MOL79	N-Acetyl-L-leucine	C8 H15 N O3	0.44	173.105	25.481	95.8	95.6	2.32334e+08
MOL80	Glycitin	C22 H22 O10	0.15	446.121	31.66	80.8	78.6	2.29013e+08
MOL81	β-Elemonic acid	C30 H46 O3	-0.93	454.344	34.565		76.9	2.28007e+08
MOL82	Aflatoxin B2	C17 H14 O6	-0.59	314.079	31.576	76	63.2	2.15642e+08
MOL83	Uridine monophosphate (UMP)	C9 H13 N2 O9 P	0.39	324.036	4.286	78.5	84.4	2.02049e+08
MOL84	Dihydrophaseicacid	C15 H22 O5	0.06	282.147	25.421	84.3		1.98607e+08
MOL85	Maleic acid	C4 H4 O4	-0.7	116.011	4.297	77.3	87.8	1.95973e+08
MOL86	2,5-Dimethyl-3-hexyne-2,5-diol	C8 H14 O2	-0.19	142.099	39.538	77.7		1.94633e+08
MOL87	Sedanolide	C12 H18 O2	-0.01	194.131	26.388	71.6	76	1.86989e+08
MOL88	D-(-)-Mannitol	C6 H14 O6	0.32	182.079	1.881	85.6	86.4	1.86911e+08
MOL89	Leucylproline	C11 H20 N2 O3	-0.68	228.147	23.416	77.3	74.8	1.77004e+08
MOL90	Genistin	C21 H20 O10	0.17	432.106	27.404	77.7	83.6	1.76914e+08
MOL91	4-Aminophenol	C6 H7 N O	0.1	109.053	3.651	71.3	81.8	1.76469e+08
MOL92	Benzoic acid	C7 H6 O2	-0.05	122.037	25.354	94.3	84.1	1.72316e+08
MOL93	Nootkatone	C15 H22 O	-0.95	218.167	29.231	81.8	80.4	1.69666e+08
MOL94	N-Acetyl-L-phenylalanine	C11 H13 N O3	0.19	207.09	26.419	85.7	89.9	1.59946e+08
MOL95	Bis(4-ethylbenzylidene)sorbitol	C24 H30 O6	0.24	414.204	40.246	88.1	88.2	1.59514e+08
MOL96	Arglabin	C15 H18 O3	-0.42	246.125	26.748	76.9	80	1.56103e+08
MOL97	4-Phenylbutyric acid	C10 H12 O2	-0.2	164.084	31.754	81.8	71.5	1.52096e+08
MOL98	Riboflavin	C17 H20 N4 O6	-0.38	376.138	24.994	84.7	74.3	1.51661e+08
MOL99	Guanosine monophosphate (GMP)	C10 H14 N5 O8 P	0.57	363.058	7.147	83.2	92.9	1.51087e+08
MOL100	3-Methoxybenzaldehyde	C8 H8 O2	-1.11	136.052	30.738	75.4	81	1.48267e+08
MOL101	Liquiritigenin	C15 H12 O4	-0.52	256.073	30.782		78.5	1.34915e+08
MOL102	DL-Tryptophan	C11 H12 N2 O2	0.72	204.09	23.395	89	94.1	1.29595e+08
MOL103	Biochanin A	C16 H12 O5	-0.6	284.068	38.266	84.9	86.2	1.28574e+08
MOL104	4-Hydroxybenzoic acid	C7 H6 O3	-0.44	138.032	31.09	66	78.3	1.24145e+08
MOL105	Glutaconic acid	C5 H6 O4	-0.11	130.027	3.397		80.6	1.23926e+08
MOL106	Naringenin	C15 H12 O5	0.19	272.069	32.863	89.7	92.2	1.23232e+08
MOL107	Ferulaldehyde	C10 H10 O3	-0.87	178.063	31.912	75.4	58.5	1.21058e+08
MOL108	Genistein	C15 H10 O5	-0.17	270.053	33.051	78.5	58.9	1.20633e+08
MOL109	D-α-Hydroxyglutaric acid	C5 H8 O5	0.28	148.037	3.324	85.8	91.2	1.16674e+08
MOL110	Germacrone	C15 H22 O	-0.97	218.167	30.828	72.9	77	1.15619e+08
MOL111	Ambrosic acid	C15 H20 O4	-0.7	264.136	36.461	85.5	77.2	1.14336e+08
MOL112	Sibiricose A5	C22 H30 O14	0.62	518.164	25.004		82.4	1.13875e+08
MOL113	5-Hydroxy-6,7-dimethoxylflavone	C17 H14 O5	-0.29	298.084	33.169	76.1	67.5	1.10039e+08
MOL114	α-Eleostearic acid	C18 H30 O2	0.17	278.225	40.284	85.7	86.8	1.09725e+08
MOL115	(+)-Bornane-2_5-dione	C10 H14 O2	-0.11	166.099	37.053	77.9		1.0805e+08
MOL116	Myristyl sulfate	C14 H30 O4 S	0.19	294.187	48.362	89.7	91.1	1.02289e+08
MOL117	2-Adamantanone	C10 H14 O	-0.32	150.104	30.857	87.8	82.4	1.02082e+08
MOL118	Nicotinyl alcohol	C6 H7 N O	-0.21	109.053	1.867	69.6	84	9.43864e+07
MOL119	4-Coumaric acid	C9 H8 O3	0.29	164.047	26.719	91.1	91	9.23479e+07
MOL120	3-Hydroxyurs-12-en-23-oic acid	C30 H48 O3	0.78	456.361	52.811	91.3	77.9	9.04533e+07
MOL121	(+/-)9,10-dihydroxy-12Z-octadecenoic acid	C18 H34 O4	0.88	314.246	40.656	87.6	88.8	9.03895e+07
MOL122	3-tert-Butyladipic acid	C10 H18 O4	0.23	202.121	30.729	77.5	75	8.54224e+07
MOL123	Linderane	C15 H16 O4	-0.64	260.105	33.144	84	75.3	8.52249e+07
MOL124	Suberic acid	C8 H14 O4	-0.66	174.089	26.573	93.3	95.6	8.39403e+07
MOL125	Ageratriol	C15 H24 O3	-0.64	252.172	25.074	69.7	77.9	8.09449e+07
MOL126	Daidzein	C15 H10 O4	-0.13	254.058	30.423	81.2	83.8	8.06461e+07
MOL127	Isoferulic acid	C10 H10 O4	-0.16	194.058	27.377	80.5	83.6	7.98254e+07
MOL128	2-Hydroxy-2-methylbutyric acid	C5 H10 O3	0.26	118.063	16.603	66.2	84.3	7.68478e+07
MOL129	Lariciresinol 4-O-glucoside	C26 H34 O11	0.91	522.211	26.07	88.8	84.6	7.48296e+07
MOL130	N-Acetyl-DL-glutamic acid	C7 H11 N O5	0.79	189.064	4.679	78.7	81.6	7.04471e+07
MOL131	exo-1,7,7-Trimethylbicyclo(2.2.1)hept-2-yl acrylate	C13 H20 O2	-0.2	208.146	33.767	79.2		6.98391e+07
MOL132	Methyl cinnamate	C10 H10 O2	-0.52	162.068	31.976	79.3	86.5	6.95362e+07
MOL133	trans-Cinnamaldehyde	C9 H8 O	-0.42	132.057	26.492		76.9	6.89348e+07
MOL134	Phenylacetaldehyde	C8 H8 O	-0.69	120.057	26.712	89.4		6.77276e+07
MOL135	4-Aminobenzoic acid	C7 H7 N O2	-0.09	137.048	27.113	86.6	94	6.74381e+07
MOL136	Curdione	C15 H24 O2	-1.04	236.177	28.998	70.5	75.3	6.70351e+07
MOL137	Radicinin	C12 H12 O5	-0.78	236.068	25.638	76.4	76.3	6.40854e+07
MOL138	Mesaconic acid	C5 H6 O4	-0.4	130.027	2.544		80.8	6.0773e+07
MOL139	Atractylenolide I	C15 H18 O2	-0.45	230.131	25.225	75.8	78.2	5.92286e+07
MOL140	Tenuifoliside A	C31 H38 O17	0.9	682.212	25.618		75.6	5.89566e+07
MOL141	19-Norandrostenedione	C18 H24 O2	-0.79	272.177	34.155	79.9	73.4	5.82441e+07
MOL142	Sinapinic acid	C11 H12 O5	0.37	224.069	26.51	84.8	87.5	5.62409e+07
MOL143	N-Acetylanthranilic acid	C9 H9 N O3	0.41	179.058	27.114	85.6	85.4	5.45976e+07
MOL144	2-Hydroxynicotinic acid	C6 H5 N O3	0.13	139.027	3.994	85.3	90.2	5.31656e+07
MOL145	3-Methyladipic acid	C7 H12 O4	-0.08	160.074	24.744	78.9	82	5.11636e+07
MOL146	Adenosine 5'-monophosphate	C10 H14 N5 O7 P	0.2	347.063	5.914	75	86.6	5.01824e+07
MOL147	Dodecanedioic acid	C12 H22 O4	-0.01	230.152	34.818	88.6	89.7	4.94333e+07
MOL148	Laurolactam	C12 H23 N O	-0.52	197.178	49.604	85.4	82.6	4.93791e+07
MOL149	L-(-)-Carvone	C10 H14 O	-0.32	150.104	33.818	76.4	66	4.82545e+07
MOL150	Isobornyl methacrylate	C14 H22 O2	-0.51	222.162	38.241	66.8	76.1	4.59994e+07
MOL151	Xanthosine	C10 H12 N4 O6	0.45	284.076	22.303	80.9	85.9	4.33413e+07
MOL152	4-Hydroxybenzaldehyde	C7 H6 O2	0	122.037	27.861	84	53.2	4.30902e+07
MOL153	5'-S-Methyl-5'-thioadenosine	C11 H15 N5 O3 S	-0.73	297.089	23.488	78.6	78.8	4.21575e+07
MOL154	3,5-Dihydroxy-2-(4-hydroxyphenyl)-4-oxo-3,4-dihydro-2H-chromen-7-yl hexopyranoside	C21 H22 O11	0.91	450.117	25.243	85.3	82.6	4.05192e+07
MOL155	Hispidulin	C16 H12 O6	-0.17	300.063	33.407	75.3	77.2	3.97942e+07
MOL156	Isoliquiritigenin	C15 H12 O4	-1.77	256.073	26.896	79.3	86.4	3.9261e+07
MOL157	α-Linolenic acid	C18 H30 O2	0.17	278.225	44.312	86.4	85.2	3.71747e+07
MOL158	3-Hydroxydecanoic acid	C10 H20 O3	0.83	188.141	35.591		78.8	3.61809e+07
MOL159	2-Hydroxy-4-methoxybenzaldehyde	C8 H8 O3	-0.66	152.047	28.22	79.9	72.7	3.57574e+07
MOL160	(+/-)13-HODE	C18 H32 O3	0.23	296.235	43.809	71.4	83.3	3.26115e+07
MOL161	OPEO	C16 H26 O2	-0.66	250.193	51.349		75.7	3.18866e+07
MOL162	DL-Homoserine	C4 H9 N O3	0.05	119.058	22.936	84.1	86.2	3.10045e+07
MOL163	N-Acetyl-L-tyrosine	C11 H13 N O4	0.26	223.085	23.837	81.9	82.7	3.04398e+07
MOL164	18-β-Glycyrrhetinic acid	C30 H46 O4	0.86	470.34	40.195	80.7	73.2	2.95995e+07
MOL165	δ-Gluconic acid δ-lactone	C6 H10 O6	-0.57	178.048	4.029	79.2	77.9	2.81199e+07
MOL166	Limonene-1_2-diol	C10 H18 O2	0.22	170.131	32.074	78.2		2.71509e+07
MOL167	2-(6-Hydroxyhexyl)-3-methylenesuccinic acid	C11 H18 O5	0.3	230.115	29.853	71.4	80	2.51065e+07
MOL168	L-Isoleucine	C6 H13 N O2	-0.2	131.095	24.767	84.6		2.40061e+07
MOL169	Pyrogallol	C6 H6 O3	-0.15	126.032	6.13	84.9	86.7	2.35512e+07
MOL170	Sophoricoside	C21 H20 O10	0.04	432.106	28.161	73.4	78.7	2.26802e+07
MOL171	Manninotriose	C18 H32 O16	0.88	504.169	6.352	76.5	72.7	2.23979e+07
MOL172	Sibiricose A3	C19 H26 O13	1.19	462.138	23.988	74.5	77.4	2.17801e+07
MOL173	Sebacicacid	C10 H18 O4	0.24	202.121	27.684	75.5		2.13459e+07
MOL174	Wilforlide A	C30 H46 O3	-1.04	454.344	43.013		75.7	2.11114e+07
MOL175	1,2,3,4-Tetramethyl-1,3-cyclopentadiene	C9 H14	-0.8	122.109	35.865		75.7	1.94553e+07
MOL176	11-Epiprostaglandin E1	C20 H34 O5	-4.47	354.239	40.641	83.2	77.5	1.90138e+07
MOL177	L-Phenylalanine	C9 H11 N O2	-0.28	165.079	25.852	76.3	76.2	1.78175e+07
MOL178	(4E)-1,7-Bis(4-hydroxyphenyl)-4-hepten-3-one	C19 H20 O3	-0.4	296.141	35.78	79.8	82.9	1.18451e+07
MOL179	Shogaol	C17 H24 O3	-0.59	276.172	39.106		77.2	1.10406e+07
MOL180	Stachyose	C24 H42 O21	1.33	666.223	22.205		83.9	8.17228e+06
MOL181	7-Methoxy-4-methylcoumarin	C11 H10 O3	-0.98	190.063	25.801	76.7	58.4	3.86812e+06
